# Supplementary material
Source: bioRxiv or medRxiv preprint supplement (https://www.biorxiv.org/highwire/filestream/62242/field_highwire_adjunct_files/8/130948-7.pdf)
Supplement: Supplementary file [file 130948-7.pdf]

| Cell Definitions for MetaCyto             | Cell Definitions for flowDensity               | Cell Definitions for ACDC                | Name                         |
|-------------------------------------------|------------------------------------------------|------------------------------------------|------------------------------|
| CD123+ HLADR-                             | CD123+HLADR-                                   | CD123+ HLADR-                            | basophils                    |
| CD14- CD33-                               | CD14-CD33-                                     |                                          | lymphocytes                  |
| CD14- CD33- CD3-                          | CD14-CD33-/CD3-                                |                                          | non-T lymphocytes            |
| CD14- CD33- CD3- CD16+ CD56+              | CD14-CD33-/CD3-/CD16+CD56+                     | CD14- CD33- CD3- CD16+ CD56+             | NK cells                     |
| CD14- CD33- CD3- CD16+ CD56+ CD161-       | CD14-CD33-/CD3-/CD16+CD56+/CD161-              |                                          | CD161- NK cells              |
| CD14- CD33- CD3- CD16+ CD56+ CD161+       | CD14-CD33-/CD3-/CD16+CD56+/CD161+              |                                          | CD161+ NK cells              |
| CD14- CD33- CD3- CD16+ CD56+ CD57-        | CD14-CD33-/CD3-/CD16+CD56+/CD57-               |                                          | CD57- NK cells               |
| CD14- CD33- CD3- CD16+ CD56+ CD57+        | CD14-CD33-/CD3-/CD16+CD56+/CD57+               |                                          | CD57+ NK cells               |
| CD14- CD33- CD3- CD16+ CD56+ CD94-        | CD14-CD33-/CD3-/CD16+CD56+/CD94-               |                                          | CD94- NK cells               |
| CD14- CD33- CD3- CD16+ CD56+ CD94+        | CD14-CD33-/CD3-/CD16+CD56+/CD94+               |                                          | CD94+ NK cells               |
| CD14- CD33- CD3- CD16+ CD56+ HLADR-       | CD14-CD33-/CD3-/CD16+CD56+/HLADR-              |                                          | HLADR- NK cells              |
| CD14- CD33- CD3- CD16+ CD56+ HLADR+       | CD14-CD33-/CD3-/CD16+CD56+/HLADR+              |                                          | HLADR+ NK cells              |
| CD14- CD33- CD3- CD19+ CD20+              | CD14-CD33-/CD3-/CD19+CD20+                     |                                          | B cells                      |
| CD14- CD33- CD3- CD19+ CD20+ CD24- CD38+  | CD14-CD33-/CD3-/CD19+CD20+/CD24-CD38+          | CD14- CD33- CD3- CD19+ CD20+ CD24- CD38+ | naive B cells                |
| CD14- CD33- CD3- CD19+ CD20+ CD24+ CD38-  | CD14-CD33-/CD3-/CD19+CD20+/CD24+CD38-          | CD14- CD33- CD3- CD19+ CD20+ CD24+ CD38- | memory B cells               |
| CD14- CD33- CD3- CD19+ CD20+ CD24+ CD38+  | CD14-CD33-/CD3-/CD19+CD20+/CD24+CD38+          | CD14- CD33- CD3- CD19+ CD20+ CD24+ CD38+ | transitional B cells         |
| CD14- CD33- CD3- CD19+ CD20+ IgD- CD27-   | CD14-CD33-/CD3-/CD19+CD20+/IgD-CD27-           |                                          | IgD-CD27- B cells            |
| CD14- CD33- CD3- CD19+ CD20+ IgD- CD27+   | CD14-CD33-/CD3-/CD19+CD20+/IgD-CD27+           |                                          | IgD-CD27+ B cells            |
| CD14- CD33- CD3- CD19+ CD20+ IgD+ CD27-   | CD14-CD33-/CD3-/CD19+CD20+/IgD+CD27-           |                                          | IgD+CD27- B cells            |
| CD14- CD33- CD3- CD19+ CD20+ IgD+ CD27+   | CD14-CD33-/CD3-/CD19+CD20+/IgD+CD27+           |                                          | IgD+CD27+ B cells            |
| CD14- CD33- CD3- CD20-                    | CD14-CD33-/CD3-/CD20-                          |                                          | CD20- CD3- lymphocytes       |
| CD14- CD33- CD3- CD20- CD27+ CD38+        | CD14-CD33-/CD3-/CD20-CD27+CD38+                | CD14- CD33- CD3- CD20- CD27+ CD38+       | plasmablasts                 |
| CD14- CD33- CD3- CD56+ CD16-              | CD14-CD33-/CD3-/CD56+CD16-                     |                                          | CD16-CD56bright NK cells     |
| CD14- CD33- CD3+                          | CD14-CD33-/CD3+                                |                                          | T cells                      |
| CD14- CD33- CD3+ CD4- CD8+ CD57-          | CD14-CD33-/CD3+/CD4-CD8+/CD57-                 |                                          | CD57-CD8+ T cells            |
| CD14- CD33- CD3+ CD4- CD8+ CD57+          | CD14-CD33-/CD3+/CD4-CD8+/CD57+                 |                                          | CD57+CD8+ T cells            |
| CD14- CD33- CD3+ CD4- CD8+ ICOS-          | CD14-CD33-/CD3+/CD4-CD8+/ICOS-                 |                                          | ICOS-CD8+ T cells            |
| CD14- CD33- CD3+ CD4- CD8+ ICOS+          | CD14-CD33-/CD3+/CD4-CD8+/ICOS+                 |                                          | ICOS+CD8+ T cell             |
| CD14- CD33- CD3+ CD4- CD8+ PD1-           | CD14-CD33-/CD3+/CD4-CD8+/PD1-                  |                                          | PD1-CD8+ T cells             |
| CD14- CD33- CD3+ CD4- CD8+ PD1+           | CD14-CD33-/CD3+/CD4-CD8+/PD1+                  |                                          | PD1+CD8+ T cells             |
| CD14- CD33- CD3+ CD4+                     | CD14-CD33-/CD3+/CD4+                           |                                          | CD4+ T cells                 |
| CD14- CD33- CD3+ CD4+ CCR7- CD45RA-       | CD14-CD33-/CD3+/CD4+/CCR7-CD45RA-              | CD14- CD33- CD3+ CD4+ CCR7- CD45RA-      | effector memory CD4+ T cells |
| CD14- CD33- CD3+ CD4+ CCR7+ CD45RA+       | CD14-CD33-/CD3+/CD4+/CCR7+CD45RA+              | CD14- CD33- CD3+ CD4+ CCR7+ CD45RA+      | effector CD4+ T cells        |
| CD14- CD33- CD3+ CD4+ CCR7+ CD45RA-       | CD14-CD33-/CD3+/CD4+/CCR7+CD45RA-              | CD14- CD33- CD3+ CD4+ CCR7+ CD45RA-      | central memory CD4+ T cells  |
| CD14- CD33- CD3+ CD4+ CCR7+ CD45RA+       | CD14-CD33-/CD3+/CD4+/CCR7+CD45RA+              | CD14- CD33- CD3+ CD4+ CCR7+ CD45RA+      | naive CD4+ T cells           |
| CD14- CD33- CD3+ CD4+ CD161-              | CD14-CD33-/CD3+/CD4+/CD161-                    |                                          | CD161-CD4+ T cells           |
| CD14- CD33- CD3+ CD4+ CD161+              | CD14-CD33-/CD3+/CD4+/CD161+                    |                                          | CD161+CD4+ T cells           |
| CD14- CD33- CD3+ CD4+ CD25+ CD127-        | CD14-CD33-/CD3+/CD4+/CD25+CD127-               | CD14- CD33- CD3+ CD4+ CD25+ CD127-       | Tregs                        |
| CD14- CD33- CD3+ CD4+ CD25+ CD127- CD161- | CD14-CD33-/CD3+/CD4+/CD25+CD127-/CD161-CD45RA- |                                          | CD161-CD45RA- Tregs          |
| CD14- CD33- CD3+ CD4+ CD25+ CD127- CD161+ | CD14-CD33-/CD3+/CD4+/CD25+CD127-/CD161-CD45RA+ |                                          | CD161-CD45RA+ Tregs          |
| CD14- CD33- CD3+ CD4+ CD25+ CD127- CD161+ | CD14-CD33-/CD3+/CD4+/CD25+CD127-/CD161+CD45RA- |                                          | CD161+CD45RA- Tregs          |
| CD14- CD33- CD3+ CD4+ CD25+ CD127- CD161+ | CD14-CD33-/CD3+/CD4+/CD25+CD127-/CD161+CD45RA+ |                                          | CD161+CD45RA+ Tregs          |
| CD14- CD33- CD3+ CD4+ CD27-               | CD14-CD33-/CD3+/CD4+/CD27-                     |                                          | CD4+CD27- T cells            |
| CD14- CD33- CD3+ CD4+ CD27+               | CD14-CD33-/CD3+/CD4+/CD27+                     |                                          | CD4+CD27+ T cells            |
| CD14- CD33- CD3+ CD4+ CD28-               | CD14-CD33-/CD3+/CD4+/CD28-                     |                                          | CD4+CD28- T cells            |
| CD14- CD33- CD3+ CD4+ CD28+               | CD14-CD33-/CD3+/CD4+/CD28+                     |                                          | CD4+CD28+ T cells            |
| CD14- CD33- CD3+ CD4+ CD85j-              | CD14-CD33-/CD3+/CD4+/CD85j-                    |                                          | CD85j-CD4+ T cells           |
| CD14- CD33- CD3+ CD4+ CD85j+              | CD14-CD33-/CD3+/CD4+/CD85j+                    |                                          | CD85j+CD4+ T cells           |
| CD14- CD33- CD3+ CD4+ CD94-               | CD14-CD33-/CD3+/CD4+/CD94-                     |                                          | CD94-CD4+ T cells            |
| CD14- CD33- CD3+ CD4+ CD94+               | CD14-CD33-/CD3+/CD4+/CD94+                     |                                          | CD94+CD4+ T cells            |
| CD14- CD33- CD3+ CD4+ HLADR- CD38-        | CD14-CD33-/CD3+/CD4+/HLADR-CD38-               |                                          | HLADR-CD38-CD4+ T cells      |
| CD14- CD33- CD3+ CD4+ HLADR- CD38+        | CD14-CD33-/CD3+/CD4+/HLADR-CD38+               |                                          | HLADR-CD38+CD4+ T cells      |
| CD14- CD33- CD3+ CD4+ HLADR+ CD38-        | CD14-CD33-/CD3+/CD4+/HLADR+CD38-               |                                          | HLADR+CD38-CD4+ T cells      |
| CD14- CD33- CD3+ CD4+ HLADR+ CD38+        | CD14-CD33-/CD3+/CD4+/HLADR+CD38+               |                                          | HLADR+CD38+CD4+ T cells      |
| CD14- CD33- CD3+ CD4+ CD8- CD57-          | CD14-CD33-/CD3+/CD4+/CD8-/CD57-                |                                          | CD57-CD4+ T cells            |
| CD14- CD33- CD3+ CD4+ CD8- CD57+          | CD14-CD33-/CD3+/CD4+/CD8-/CD57+                |                                          | CD57+CD4+ T cells            |
| CD14- CD33- CD3+ CD4+ CD8- ICOS-          | CD14-CD33-/CD3+/CD4+/CD8-/ICOS-                |                                          | ICOS-CD4+ T cells            |
| CD14- CD33- CD3+ CD4+ CD8- ICOS+          | CD14-CD33-/CD3+/CD4+/CD8-/ICOS+                |                                          | ICOS+CD4+ T cell             |
| CD14- CD33- CD3+ CD4+ CD8- PD1-           | CD14-CD33-/CD3+/CD4+/CD8-/PD1-                 |                                          | PD1-CD4+ T cells             |
| CD14- CD33- CD3+ CD4+ CD8- PD1+           | CD14-CD33-/CD3+/CD4+/CD8-/PD1+                 |                                          | PD1+CD4+ T cells             |
| CD14- CD33- CD3+ CD56+                    | CD14-CD33-/CD3+/CD56+                          | CD14- CD33- CD3+ CD56+                   | NKT cells                    |
| CD14- CD33- CD3+ CD8+                     | CD14-CD33-/CD3+/CD8+                           |                                          | CD8+ T cells                 |
| CD14- CD33- CD3+ CD8+ CCR7- CD45RA-       | CD14-CD33-/CD3+/CD8+/CCR7-CD45RA-              | CD14- CD33- CD3+ CD8+ CCR7- CD45RA-      | effector memory CD8+ T cells |
| CD14- CD33- CD3+ CD8+ CCR7+ CD45RA+       | CD14-CD33-/CD3+/CD8+/CCR7+CD45RA+              | CD14- CD33- CD3+ CD8+ CCR7+ CD45RA+      | effector CD8+ T cells        |
| CD14- CD33- CD3+ CD8+ CCR7+ CD45RA-       | CD14-CD33-/CD3+/CD8+/CCR7+CD45RA-              | CD14- CD33- CD3+ CD8+ CCR7+ CD45RA-      | central memory CD8+ T cells  |
| CD14- CD33- CD3+ CD8+ CCR7+ CD45RA+       | CD14-CD33-/CD3+/CD8+/CCR7+CD45RA+              | CD14- CD33- CD3+ CD8+ CCR7+ CD45RA+      | naive CD8+ T cells           |
| CD14- CD33- CD3+ CD8+ CD161-              | CD14-CD33-/CD3+/CD8+/CD161-                    |                                          | CD161-CD8+ T cells           |
| CD14- CD33- CD3+ CD8+ CD161+              | CD14-CD33-/CD3+/CD8+/CD161+                    |                                          | CD161+CD8+ T cells           |
| CD14- CD33- CD3+ CD8+ CD27-               | CD14-CD33-/CD3+/CD8+/CD27-                     |                                          | CD27-CD8+ T cells            |
| CD14- CD33- CD3+ CD8+ CD27+               | CD14-CD33-/CD3+/CD8+/CD27+                     |                                          | CD27+CD8+ T cells            |
| CD14- CD33- CD3+ CD8+ CD28-               | CD14-CD33-/CD3+/CD8+/CD28-                     |                                          | CD28-CD8+ T cells            |
| CD14- CD33- CD3+ CD8+ CD28+               | CD14-CD33-/CD3+/CD8+/CD28+                     |                                          | CD28+CD8+ T cells            |
| CD14- CD33- CD3+ CD8+ CD85j-              | CD14-CD33-/CD3+/CD8+/CD85j-                    |                                          | CD85j-CD8+ T cells           |
| CD14- CD33- CD3+ CD8+ CD85j+              | CD14-CD33-/CD3+/CD8+/CD85j+                    |                                          | CD85j+CD8+ T cells           |
| CD14- CD33- CD3+ CD8+ CD94-               | CD14-CD33-/CD3+/CD8+/CD94-                     |                                          | CD94-CD8+ T cells            |
| CD14- CD33- CD3+ CD8+ CD94+               | CD14-CD33-/CD3+/CD8+/CD94+                     |                                          | CD94+CD8+ T cells            |
| CD14- CD33- CD3+ CD8+ HLADR- CD38-        | CD14-CD33-/CD3+/CD8+/HLADR-CD38-               |                                          | HLADR-CD38-CD8+ T cells      |
| CD14- CD33- CD3+ CD8+ HLADR- CD38+        | CD14-CD33-/CD3+/CD8+/HLADR-CD38+               |                                          | HLADR-CD38+CD8+ T cells      |
| CD14- CD33- CD3+ CD8+ HLADR+ CD38-        | CD14-CD33-/CD3+/CD8+/HLADR+CD38-               |                                          | HLADR+CD38-CD8+ T cells      |
| CD14- CD33- CD3+ CD8+ HLADR+ CD38+        | CD14-CD33-/CD3+/CD8+/HLADR+CD38+               |                                          | HLADR+CD38+CD8+ T cells      |
| CD14- CD33- CD3+ CD56+ CD161-             | CD14-CD33-/CD3+/CD56+/CD161-                   |                                          | CD161- NKT cells             |
| CD14- CD33- CD3+ CD56+ CD161+             | CD14-CD33-/CD3+/CD56+/CD161+                   |                                          | CD161+ NKT cells             |
| CD14- CD33- TCRgd+                        | CD14-CD33-/TCRgd+                              | CD14- CD33- TCRgd+                       | gamma-delta T cells          |
| CD14+ CD33+                               | CD14+CD33+                                     | CD14+ CD33+                              | monocytes                    |
| CD14+ CD33+ CD14- CD16+                   | CD14+CD33+/CD14-CD16+                          |                                          | CD16+CD14- monocytes         |
| CD14+ CD33+ CD14+ CD16+                   | CD14+CD33+/CD14+CD16+                          |                                          | CD16+CD14+ monocytes         |
| CD14+ CD33+ CD16-                         | CD14+CD33+/CD16-                               |                                          | CD16- monocytes              |
| CD14+ CD33+ CD16+                         | CD14+CD33+/CD16+                               |                                          | CD16+ monocytes              |

Supplementary Table 2: A list of cell definitions used to identify the 88 cell populations in cytometry data (SDY478) from ImmPort. The cell definitions are created based on the author's gating strategy provided in SDY478.
